# Supplementary material for: Feature selection for high-dimensional temporal data
Source: PubMed Central journal article supplement (PMC5778658; doi:10.1186/s12859-018-2023-7), 2018-01-23
Supplement: 12859_2018_2023_MOESM1_ESM.pdf [file 12859_2018_2023_MOESM1_ESM.pdf]

# Feature selection for high-dimensional temporal data: supplementary material

Michail Tsagris

Vincenzo Lagani

Ioannis Tsamardinos

November 6, 2017

## 1 Example datasets for the 4 scenarios

- Table S1 give an example of the data structure in the **Temporal-longitudinal** scenario using the GDS4258 dataset. It can be seen that each subject contains 3 measurements in total, one for each of the 3 distinct time points.
- Table S2 presents example data from the GDS3859 dataset used in the **Temporal-distinct** scenario. Time points are again present, but each measurement refers to a different subject. This means that measurements can be freely shuffled within each column.
- An example of the **static-longitudinal** scenario is given in Table S3 where measurements are taken for each subject at three different time points. The goal is to discriminate between the two groups (infected - not infected). The numbers come from the GDS4518 dataset.
- Finally, data from the the GDS1784 dataset are used as an illustrative example of the **static-distinct** scenario in Table S4. Measurement across columns refer to different subjects, and thus also in this case measurements can be freely shuffled within each column.

Table S1: GDS4258 example data of the **Temporal-longitudinal** scenario.

|         | Time points |          |          |
|---------|-------------|----------|----------|
| Subject | 4 Hours     | 18 Hours | 48 Hours |
| 1       | 6.28270     | 5.86563  | 6.57527  |
| 2       | 7.00407     | 7.40996  | 6.16624  |
| 3       | 6.66389     | 6.02764  | 6.30283  |
| 4       | 6.84890     | 7.04820  | 9.95038  |
| 5       | 9.28854     | 10.18260 | 9.64682  |

Table S2: GDS3859 example data of the **Temporal-distinct** scenario.

| Time points |          |          |          |
|-------------|----------|----------|----------|
| 0 Days      | 2 Days   | 4 Days   | 6 Days   |
| 6.458359    | 5.839970 | 6.123457 | 6.104052 |
| 5.509668    | 6.549998 | 6.376203 | 6.366128 |
| 6.071216    | 5.981081 | 6.287715 | 6.421593 |
| 6.586743    | 6.235236 | 6.064854 | 6.139346 |
| 6.166189    | 7.107606 | 6.852170 | 7.302294 |

Table S3: GDS4518 example data of the **Static-longitudinal** scenario.

| Time points       |         |         |          |
|-------------------|---------|---------|----------|
| Subject and group | 2 Hours | 6 Hours | 24 Hours |
| 1-Not infected    | 10.4001 | 10.4665 | 10.3801  |
| 2-Not infected    | 10.9035 | 10.5774 | 10.5205  |
| 3-Not infected    | 10.3322 | 10.7477 | 11.0272  |
| 4-Infected        | 10.7066 | 11.0553 | 10.9070  |
| 5-Infected        | 10.9118 | 11.1279 | 10.7836  |
| 6-Infected        | 10.5297 | 10.4485 | 10.4771  |

Table S4: GDS1784 example data of the **Static-distinct** scenario.

| Genotype       | Time points |          |          |          |          |
|----------------|-------------|----------|----------|----------|----------|
|                | 0 Hours     | 2 Hours  | 6 Hours  | 24 Hours | 48 Hours |
| Wild type      | 7.038740    | 7.261660 | 6.771664 | 7.356893 | 7.168742 |
| Wild type      | 7.092083    | 7.188458 | 6.699224 | 7.303311 | 7.197353 |
| Wild type      | 7.043116    | 6.943344 | 7.299777 | 7.187256 | 7.088342 |
| PKB alpha null | 7.108351    | 6.902910 | 7.263736 | 7.288340 | 7.226173 |
| PKB alpha null | 7.106368    | 7.065784 | 7.303170 | 7.242576 | 7.038740 |
| PKB alpha null | 7.174931    | 6.998802 | 7.095330 | 7.254913 | 7.092083 |

## 2 The SES algorithm

The pseudo-code of SES is shown in Algorithm 1. Briefly, let  $\mathcal{V}$  and  $T$  denote the set of predictor variables and the target variable respectively. In order to assess the null hypothesis  $Ind(X; T|\mathbf{Z})$ , a conditional independence test is performed. Denote with  $p_{XT|\mathbf{Z}}$  the corresponding  $p$ -value. If  $p_{XT|\mathbf{W}} \leq \alpha$ , where  $\alpha$  is a user-defined threshold, the null hypothesis is rejected. The algorithm requires to specify two hyper-parameters,  $k$ , the maximum size of the conditioning set, and  $\alpha$ , the significance level for rejecting independence.

In the first step, the univariate (unconditional) associations between the target variable and the predictor variables are calculated. The variables corresponding to non significant associ-

ations are discarded. In all subsequent iterations conditional associations are calculated. At each iteration the algorithm identifies the variable with the highest association with  $T$  given any possible conditioning set  $\mathbf{Z}$  s.t.  $\mathbf{Z} \subseteq \mathcal{S}, |\mathbf{Z}| \leq k$ , where  $k$  denotes the maximum number of conditioning variables. Variables found not associated with  $T$  for any conditioning set are discarded. SES stops when no variables are left for examination, i.e.,  $\mathcal{R} = \emptyset$ . Before definitely discarding a variable, the algorithm checks whether the variable is equivalent to any predictor already in  $\mathcal{S}$ . If such equivalence exists, it is cached and provided as an output for the user. For more information about SES and its equivalence-discovering mechanism see Lagani et al. (2017).

The cornerstone upon which SES is built is the test of conditional independence used for computing  $p_{XT|\mathbf{Z}}$ . This holds as well for any other constraint-based feature selection algorithm (Aliferis et al., 2010). The test of conditional independence must be able to correctly deal with the idiosyncrasies of the data at hand. In case of temporal data, we propose to use the most appropriate test among the ones defined by Equations (4)-(7) in the main text and based on GLMMs and GEE models.

---

**Algorithm 1** SES

---

```
1: Input:
2: Data set on  $n$  predictive variables  $V$ ,
3: Target variable  $T$ ,
4: Max conditioning set  $k$ , Significance threshold  $a$ 
5:
6: Output:
7: A set  $E$  of size  $n$  of variables sets  $Q_i, i = 1, \dots, n$ 
8: such that one can construct
9: a signature by selecting one and only one variable from each set  $Q_i$ 
10: //Remaining variables
11:  $R \leftarrow V$ 
12: //Currently selected variables
13:  $S \leftarrow \emptyset$ 
14: //Sets of equivalences
15:  $Q_i \leftarrow i$ , for  $i = 1, \dots, n$ 
16:
17: while  $R \neq \emptyset$  do
18:   for all  $X \in \{R \cup S\}$  do
19:     if  $\exists Z \subseteq S \setminus \{X\}, |Z| \leq k, s.t., p_{XT.Z} > a$  then
20:        $R \leftarrow R \setminus \{X\}$ 
21:        $S \leftarrow S \cup \{X\}$ 
22:
23:       //Identify statistical equivalences,
24:       //i.e.,  $X$  and  $Y$  seem interchangeable
25:       if  $\exists Y \in Z, s.t., Z' \leftarrow (Z \cup \{X\}) \setminus \{Y\}, p_{YT.Z'} > a$  then
26:          $Q_Y \leftarrow Q_Y \cup Q_X$ 
27:
28:       end if
29:     end if
30:   end for
31:
32:    $M = \operatorname{argmax}_{\{X \in R\}} \min_{\{Z \subseteq S, |Z| \leq k\}} p_{XT.Z}$ 
33:    $R \leftarrow R \setminus \{M\}$ 
34:    $S \leftarrow S \cup \{M\}$ 
35:
36: end while
37:
38: Repeat the for-loop one last time
39: //Pack all the identified equivalences in one data structure
40:  $E \leftarrow \emptyset$ 
41: for all  $i \in S$  do
42:    $E \leftarrow E \cup \{Q_i\}$ 
43:
44: end for
45:
46: return  $E$ 
```

---

### 3 Information about the datasets used in the experimentation

Tables S5 and S6 summarize some information about the datasets; namely the number of variables of subjects, relative group allocation (for the **Static-longitudinal** and **Static-distinct** scenarios only) and number of time points. Even though The numbers of variables are not really high enough, they are frequently met in bioinformatical applications. The sample sizes though are small and this is because wet lab experiments, especially with mice, and also experiments with human subjects can be quite expensive.

Table S5: Information about the datasets

| Temporal-longitudinal scenario |                     |                    |                       |
|--------------------------------|---------------------|--------------------|-----------------------|
| Dataset                        | Number of Variables | Number of subjects | Number of time points |
| GDS5088                        | 33295               | 11                 | 4                     |
| GDS4395                        | 54667               | 10                 | 7                     |
| GDS4822                        | 45037               | 9                  | 5                     |
| GDS3326                        | 54674               | 15                 | 4                     |
| GDS3181                        | 22283               | 12                 | 3                     |
| GDS4258                        | 54674               | 11                 | 3                     |
| GDS3915                        | 15921               | 9                  | 5                     |
| GDS3432                        | 40067               | 5                  | 4                     |

  

| Temporal-distinct scenario |                     |                |                       |
|----------------------------|---------------------|----------------|-----------------------|
| Dataset                    | Number of variables | No of subjects | Number of time points |
| GDS3859                    | 45100               | 23             | 4                     |
| GDS972                     | 15922               | 44             | 11                    |
| GDS947                     | 16927               | 46             | 8                     |
| GDS964                     | 15922               | 53             | 15                    |
| GDS2688                    | 15923               | 45             | 11                    |
| GDS2135                    | 22690               | 23             | 5                     |

## 4 Supplementary methods

### 4.1 Assessing the equivalence of SES multiple signatures

For every fold of the cross validation we calculated the predicted values and thus the performance, of each signature as produced by SES. The mean of the standard deviation, minimum, maximum and coefficient of variation of all performances were then computed and are presented in Tables S8 and S10. The relevant boxplots of the performances appear in Figures S4 and S5.

Table S6: Information about the datasets

| Static-longitudinal scenario |                     |                |                           |                       |
|------------------------------|---------------------|----------------|---------------------------|-----------------------|
| Dataset                      | Number of variables | No of subjects | Relative group allocation | Number of time points |
| GDS4146                      | 22645               | 25             | (0.64, 0.36)              | 5                     |
| GDS4518                      | 24128               | 12             | (0.50, 0.50)              | 3                     |
| GDS4820                      | 54675               | 8              | (0.50, 0.50)              | 3                     |
| GDS1840                      | 15923               | 8              | (0.50, 0.50)              | 4                     |
| Static-distinct scenario     |                     |                |                           |                       |
| Dataset                      | Number of variables | No of subjects | Relative group allocation | Number of time points |
| GDS4319                      | 35556               | 112            | (0.35, 0.32, 0.33)        | 6                     |
| GDS3924                      | 38535               | 48             | (0.25, 0.25, 0.50)        | 2                     |
| GDS3184                      | 22575               | 47             | (0.49, 0.51)              | 4                     |
| GDS3145                      | 22690               | 64             | (0.50, 0.50)              | 4                     |
| GDS3944                      | 18116               | 32             | (0.50, 0.50)              | 4                     |
| GDS2882                      | 45101               | 40             | (0.50, 0.50)              | 4                     |
| GDS2851                      | 8799                | 23             | (0.44, 0.56)              | 6                     |
| GDS1784                      | 22690               | 36             | (0.50, 0.50)              | 5                     |
| GDS2456                      | 45101               | 39             | (0.51, 0.49)              | 4                     |

## 4.2 Using LASSO and gLASSO for the Temporal-distinct and Static-distinct scenarios

Yang and Zou (2015) suggested the gLASSO for when there are categorical variables. In multinomial regression a continuous variable has  $D - 1$  coefficients, where  $D$  denotes the number of values of the response variable. In the univariate regression, a categorical predictor variable has  $d - 1$  coefficients, one for each of the  $d - 1$  dummy variables, where  $d$  is the number of levels of this variable. The classical LASSO would penalise the coefficients ignoring this information. gLASSO overcomes this problem by shrinking towards zero, if necessary, all coefficients of a predictor variable simultaneously. This way, the variable is either included in the model or not, unlike LASSO, where a non-significant variable can stay in the model only because some of its coefficients are not zero.

## 5 Supplementary Results

### 5.1 glmLasso scalability in high-dimensional data

Figure S1 shows how glmLasso, SESglmm and SESgee (**Temporal-longitudinal** scenario) compare in terms of computational time. Both of the algorithms are written in R so the comparison is fair. When there are 2500 predictor variables, the time required by glmLasso is 6

times the time required by SESglimm and SESgee. As seen from this Figure, the ratio of time increases as the number of variables increase.

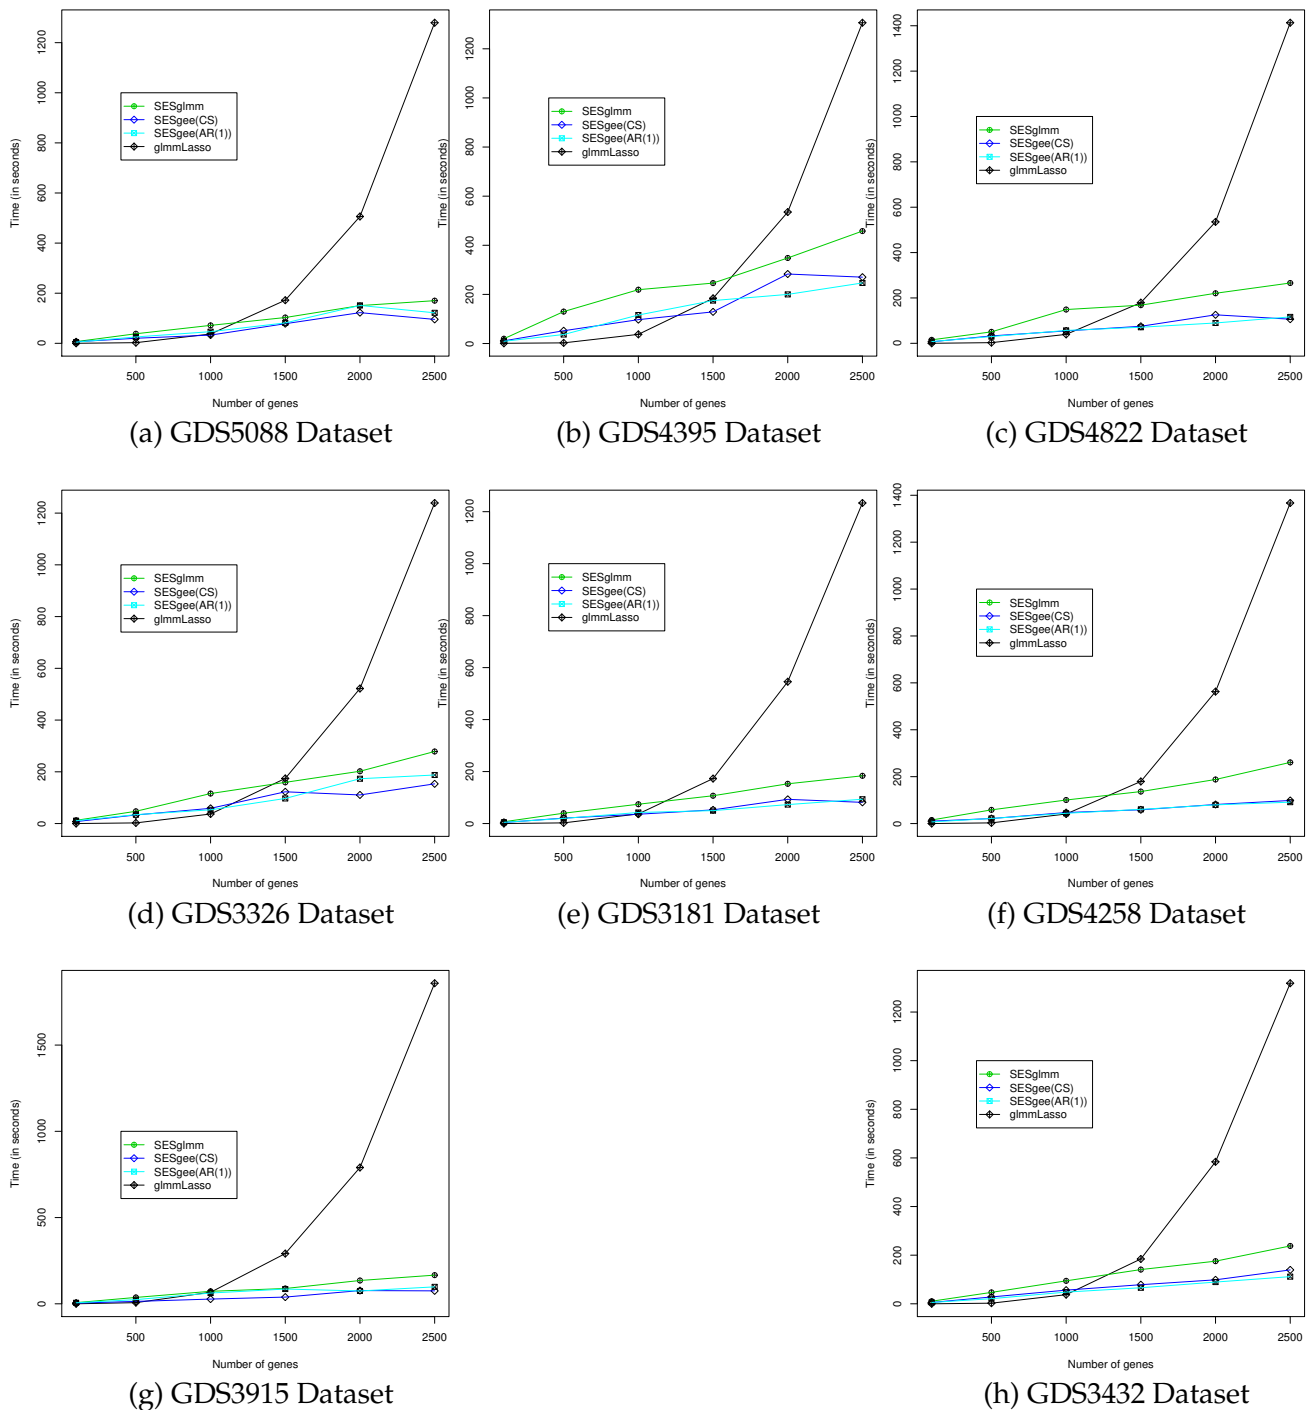

Figure S1: **Temporal-longitudinal** scenario: Time in seconds required by each of the three algorithms. Note, that for glmLasso, the combined algorithm of gradient ascent and Fisher scoring was used. If no Fisher scoring was involved, the computational cost would be more than double of what currently is.

## 5.2 Computational requirements for SESglimm and SESgee and number of variables

Table 2 in the main text presents the computational cost, expressed in seconds, associated with SESglimm and SESgee. We detected a significant relationship between these two. At first, we removed the dataset GDS4395 as it was the most computationally expensive and would influence the results. For each method, (SESglimm, SESgee(CS), SESgee(AR(1))) there was a strong and significant relationship between the time and the number of variables. The degree of relationship increased when the logarithm for both measurements was applied, exhibiting a linear relationship between the two. We highlight that a quadratic term was not significant.

We then fitted a linear regression model combining all (logged) measurements, including two dummy variables indicating the method. Figure S3 shows graphically the results.

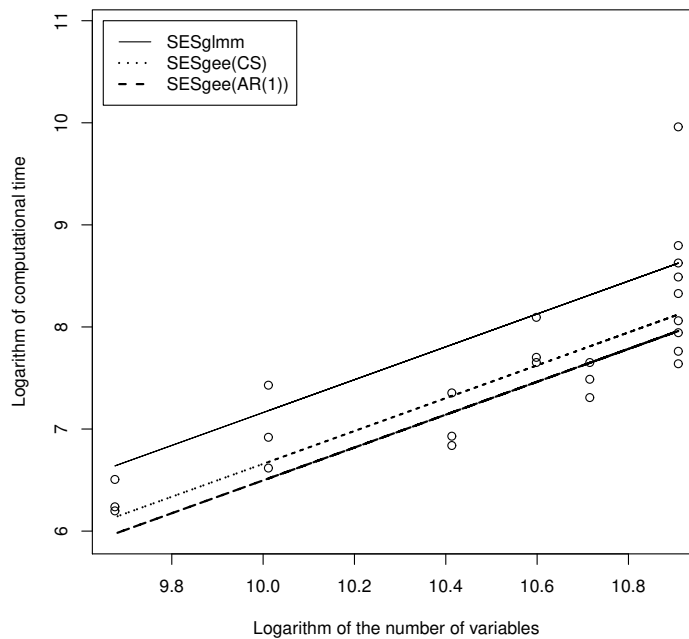

Figure S2: **Temporal-longitudinal** scenario: Logarithm of the number of variables versus the logarithm of the computational time for SESglimm and SESgee.

## 5.3 GDS5088: Comparison between SESglimm and glmLasso

Figure S3 presents the box-plot of the MSPE between SESglimm and glmLasso not shown in Figure 1(d) in the main text.

## 5.4 SES produces signatures with equivalent predictive performances

Figure S4 shows the box plots of the performances of all signatures as produced by the cross validations for the **Temporal-longitudinal** scenario. The performances are data dependent, as neither GLMM or GEE produces consistently better performances. The same is true for the variation in the performances. Figure S5 shows the performances of SES for the **Temporal-distinct** and **Static-distinct** scenarios. The same image as before is apparent here. For some



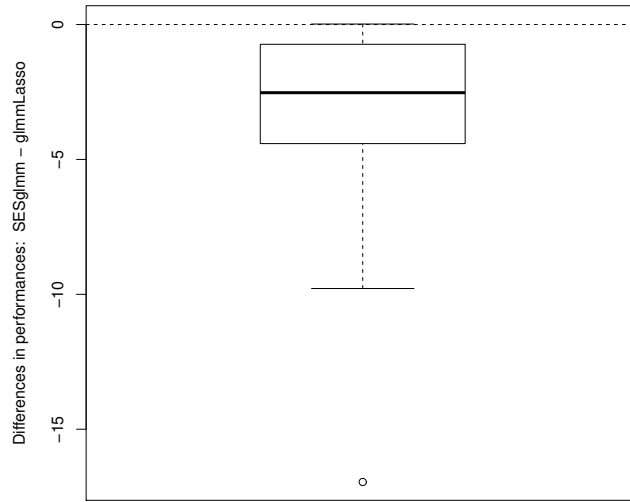

Figure S3: **Temporal-longitudinal** scenario: Dataset GDS5088. Difference in MSPE between SESglmm and glmLasso (SESglmm-glmLasso). Negative values indicate better performance of SESglmm.

datasets, there is little variation in the performances, whereas for others the performances vary greatly.

Let us remind ourselves that SES identifies equivalent variables, which are assumed to lead to statistically equivalent signatures. Having said that, it is natural to expect some discrepancies. If for example, the hypothesis is true, that the performance is uniform for all signatures, some signatures are expected to fall far from the others.

Table S7: **Temporal-longitudinal** scenario: Mean number of selected variables and signatures (the standard deviation appears inside the parentheses) produced by SESglmm and SESgees based on the the  $m$ -fold cross-validations.

| Dataset | Mean selected variables |            |               | Mean number of signatures |                  |                    |
|---------|-------------------------|------------|---------------|---------------------------|------------------|--------------------|
|         | SESglmm                 | SESgee(CS) | SESgee(AR(1)) | SESglmm                   | SESgee(CS)       | SESgee(AR(1))      |
| GDS5088 | 4.96(0.95)              | 4.75(1.19) | 5.12(1.26)    | 11.54(15.68)              | 113.50(169.18)   | 1188.17(2249.46)   |
| GDS4395 | 6.27(0.69)              | 6.03(1.30) | 5.73(1.36)    | 1.47(0.94)                | 86.42(151.41)    | 177.83(514.10)     |
| GDS4822 | 5.33(0.87)              | 3.88(0.74) | 5.00(0.72)    | 246.69(246.815)           | 400.96(686.61)   | 19.88(34.78)       |
| GDS3326 | 6.21(0.83)              | 5.75(0.85) | 6.29(0.81)    | 55.88(81.42)              | 2669.17(8237.89) | 34.67(40.75)       |
| GDS3181 | 4.25(0.68)              | 3.62(0.88) | 4.21(0.59)    | 175.29(537.62)            | 254.79(531.30)   | 154.38(392.16)     |
| GDS4258 | 4.67(0.49)              | 3.78(0.88) | 4.17(0.86)    | 5.17(4.95)                | 487.61(540.92)   | 1765.44(3470.62)   |
| GDS3432 | 3.88(0.80)              | 3.33(0.70) | 4.33(0.64)    | 60.62(100.93)             | 1304.47(1996.69) | 16584.79(30928.47) |
| GDS3915 | 5.92(0.88)              | 4.96(0.95) | 5.83(0.96)    | 24.79(41.28)              | 816.50(1456.31)  | 8.62(13.32)        |

Figure S5 contain the box-plots of the performances of all signatures produced by SES via the  $m$ -fold cross validations for the **Temporal-distinct** and **Static-distinct** scenarios. More in-

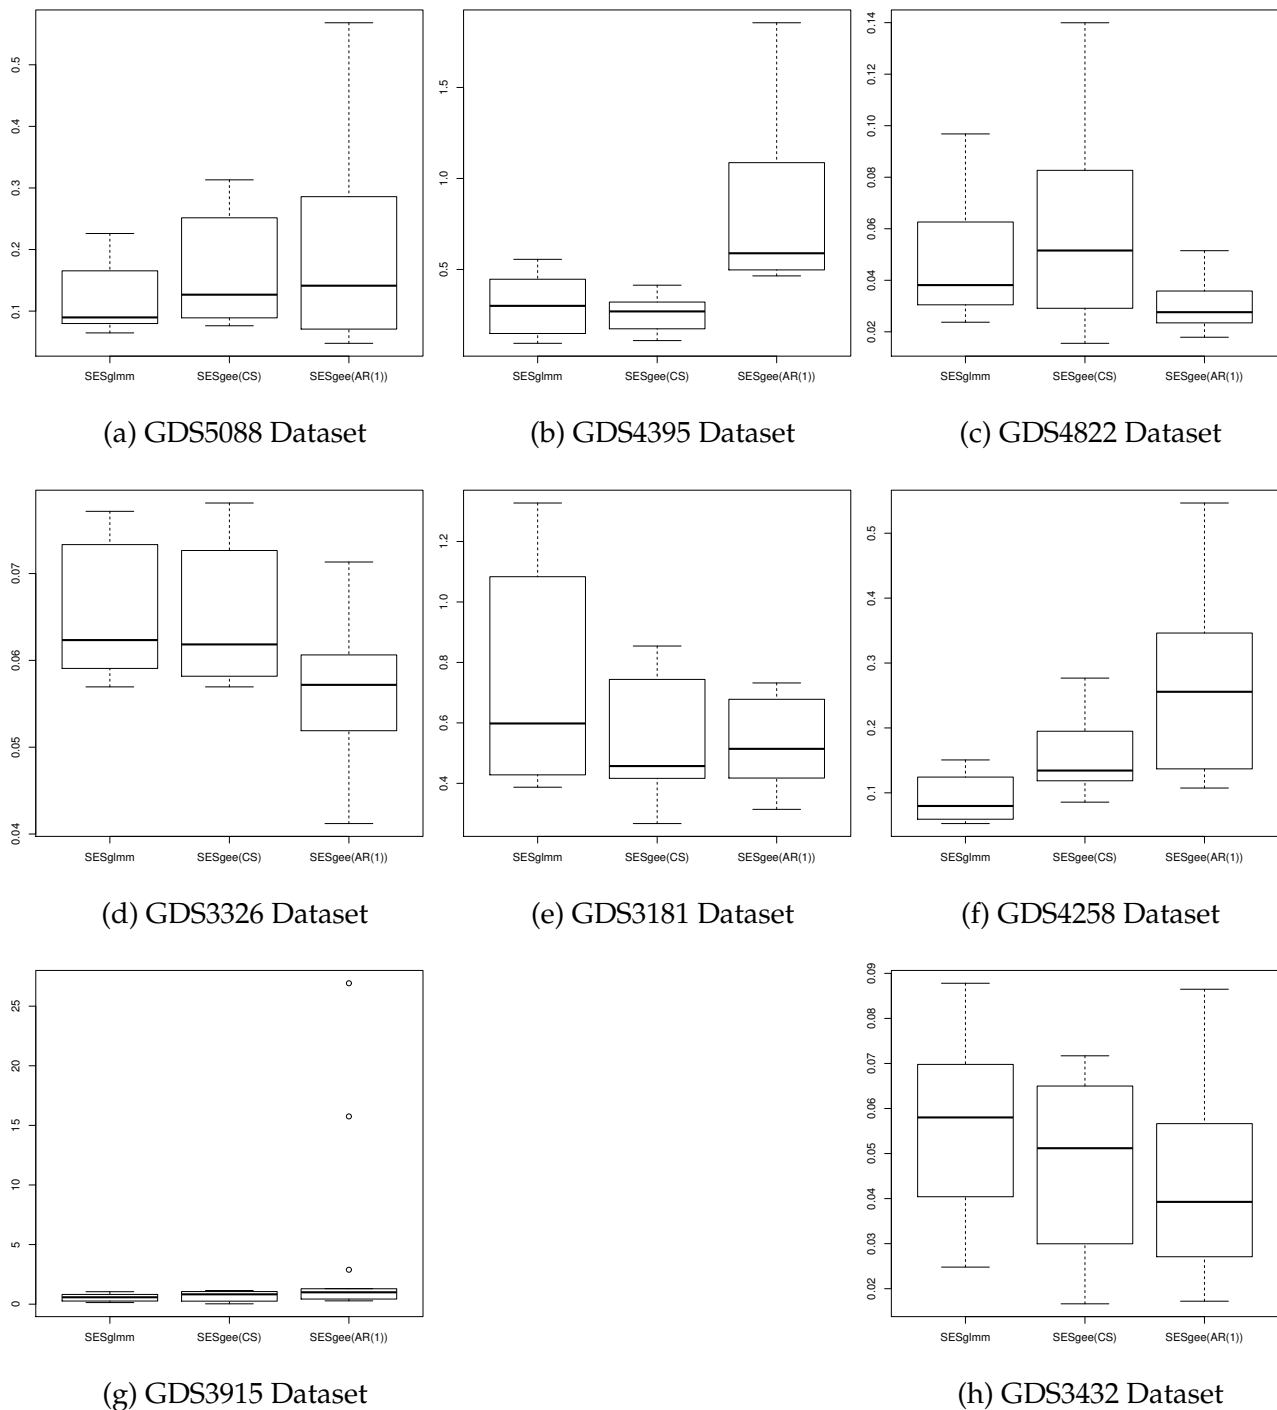

Figure S4: **Temporal-longitudinal** scenario: Box plots of the performance of the signatures of the three SES methods as produced by the  $6m$  cross validations.

formation characterizing these performances is available in Table S10.

The overall performances of SES and all types of LASSO under each Scenario were compared via a paired t-test was calculated whose p-value was computed using 9999 permutations. As expected, for Scenario 1(a), SESglmm and SESgee do not produce statistically significant differences, whereas glmmLasso does differ. LASSO outperformed SES in the **Temporal-longitudinal** scenario, but this was something to be expected. When it comes to the **Static-**

Table S8: **Temporal-longitudinal** scenario: Means of the standard deviations, minimum, maximum and coefficient of variations of the the performance (MSPE) of all signatures, as produced by SESgmm and SESgees based on the  $m$ -fold cross-validations (every fold contains 6 pairs of the hyper-parameters  $a$  and  $k$ , thus  $6m$  runs of SES each with at least one signature).

| Dataset | Mean standard deviation       |            |                | Mean coefficient of variation |                |               |
|---------|-------------------------------|------------|----------------|-------------------------------|----------------|---------------|
|         | SESgmm                        | SESgee(CS) | SESgee(AR(1))  | SESgmm                        | SESgee(CS)     | SESgee(AR(1)) |
| GDS5088 | 0.017                         | 0.163      | 0.246          | 0.163                         | 0.671          | 0.868         |
| GDS4395 | 0.048                         | 1.22       | 0.185          | 0.144                         | 0.224          | 0.237         |
| GDS4822 | 0.020                         | 0.022      | 0.003          | 0.396                         | 0.356          | 0.109         |
| GDS3326 | 0.008                         | 0.008      | 0.005          | 0.115                         | 0.116          | 0.094         |
| GDS3181 | 0.254                         | 0.115      | 0.135          | 0.310                         | 0.202          | 0.230         |
| GDS4258 | 0.015                         | 0.058      | 0.091          | 0.143                         | 0.355          | 0.328         |
| GDS3432 | 0.171                         | 1.033      | 2.367          | 0.307                         | 2.483          | 13.590        |
| GDS3915 | 0.007                         | 0.017      | 0.006          | 0.152                         | 0.470          | 0.125         |
|         | Mean minimum & maximum values |            |                |                               |                |               |
|         | SESgmm                        |            | SESgee(CS)     |                               | SESgee(AR(1))  |               |
| Dataset | (Min, Max)                    |            | (Min, Max)     |                               | (Min, Max)     |               |
| GDS5088 | (0.104, 0.140)                |            | (0.091, 0.795) |                               | (0.071, 1.175) |               |
| GDS4395 | (0.279, 0.328)                |            | (0.216, 0.350) |                               | (0.652, 1.428) |               |
| GDS4822 | (0.014, 0.132)                |            | (0.019, 0.246) |                               | (0.027, 0.034) |               |
| GDS3326 | (0.056, 0.077)                |            | (0.055, 0.077) |                               | (0.049, 0.066) |               |
| GDS3181 | (0.500, 1.232)                |            | (0.450, 0.740) |                               | (0.344, 0.864) |               |
| GDS4258 | (0.073, 0.105)                |            | (0.093, 0.314) |                               | (0.097, 0.649) |               |
| GDS3432 | (0.333, 1.004)                |            | (0.165, 3.890) |                               | (0.104, 8.18)  |               |
| GDS3915 | (0.046, 0.066)                |            | (0.027, 0.093) |                               | (0.037, 0.050) |               |

Table S9: Scenario 1(a): Range of values of  $\lambda$  used in glmLasso.

| Dataset            | GDS5088 | GDS4395 | GDS4822 | GDS3326 | GDS3181 | GDS4258 | GDS3432 | GDS3915 |
|--------------------|---------|---------|---------|---------|---------|---------|---------|---------|
| Range of $\lambda$ | [10-20] | [20-40] | [10-30] | [15-30] | [25-40] | [45-55] | [25-45] | [5-15]  |

**longitudinal** and **Static-distinct** scenarios, even though SES produced better results than LASSO the difference between the two seems not to be statistically significant.

## 6 Enrichment analysis on selected datasets

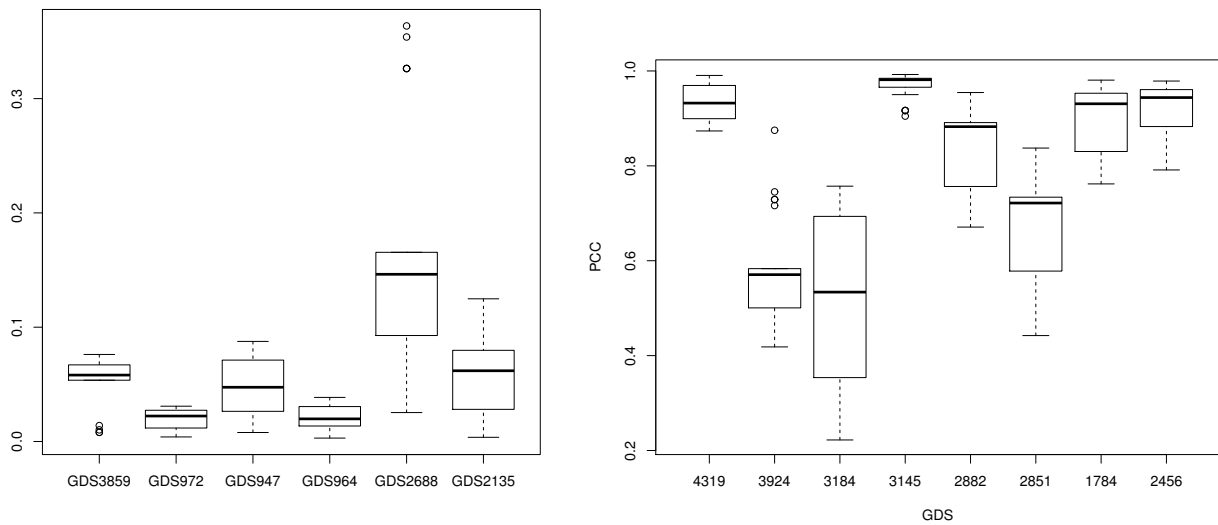

Figure S5: **Temporal-distinct** scenario: Box plots of the performance of the multiple signatures of SES as produced by the  $6m$  cross validations (left) and **Static-distinct** scenario: Box plots of the performance of the multiple signatures of SES as produced by the  $6m$  cross validations (right).

## References

- Aliferis, C. F., Statnikov, A. R., Tsamardinos, I., Mani, S., and Koutsoukos, X. D. (2010). Local Causal and Markov Blanket Induction for Causal Discovery and Feature Selection for Classification Part I : Algorithms and Empirical Evaluation. *Journal of Machine Learning Research*, 11:171–234.
- Lagani, V., Athineou, G., Farcomeni, A., Tsagris, M., and Tsamardinos, I. (2017). Feature selection with the r package mxm: Discovering statistically-equivalent feature subsets. *Journal of Statistical Software*, 80.
- Yang, Y. and Zou, H. (2015). A fast unified algorithm for solving group-lasso penalize learning problems. *Statistics and Computing*, 25(6):1129–1141.

Table S10: Means of the standard deviations, minimum, maximum and coefficient of variation (CV) of the the performance (MSPE) of all signatures, as produced by SEStimereg based on the  $m$ -fold cross-validations (every fold contains 6 pairs of the hyper-parameters  $a$  and  $k$ , thus  $6m$  runs of SES each with at least one signature) for the **Temporal-distinct** and **Static-distinct** scenarios.

| <b>Temporal-distinct scenario</b> |                    |       |                |
|-----------------------------------|--------------------|-------|----------------|
| Dataset                           | Standard deviation | CV    | (Min, Max)     |
| GDS3859                           | 0.019              | 0.382 | (0.019, 0.027) |
| GDS972                            | 0.002              | 0.158 | (0.018, 0.022) |
| GDS947                            | 0.001              | 0.192 | (0.038, 0.058) |
| GDS964                            | 0.003              | 0.140 | (0.018, 0.025) |
| GDS2688                           | 0.019              | 0.157 | (0.136, 0.206) |
| GDS2135                           | 0.037              | 0.499 | (0.019, 0.158) |
| <b>Static-distinct scenario</b>   |                    |       |                |
| Dataset                           | Standard deviation | CV    | (Min, Max)     |
| GDS4319                           | 0.004              | 0.043 | (0.775, 0.994) |
| GDS3924                           | 0.165              | 0.300 | (0.257, 0.875) |
| GDS3184                           | 0.139              | 0.308 | (0.213, 0.796) |
| GDS3145                           | 0.052              | 0.054 | (0.779, 1.000) |
| GDS3944                           | –                  | –     | (–, –)         |
| GDS2882                           | 0.118              | 0.145 | (0.554, 1.000) |
| GDS2851                           | 0.152              | 0.228 | (0.366, 0.861) |
| GDS1784                           | 0.126              | 0.110 | (0.412, 1.000) |
| GDS2456                           | 0.116              | 0.132 | (0.291, 1.000) |

Table S11: Permutation based (9999 permutations) p-values using the paired t-test statistic as the test statistic for comparing the overall performances across the different methods and Scenarios.

| <b>Temporal-longitudinal scenario</b> |         |
|---------------------------------------|---------|
| Methods                               | p-value |
| SESGlmm Vs SESgee(CS)                 | 0.7265  |
| SESGlmm Vs SESgee(AR(1))              | 0.6716  |
| SESgee(CS) Vs SESgee(AR(1))           | 0.3706  |
| SESGlmm Vs glmmLasso                  | 0.0158  |
| SESgee(CS) Vs glmmLasso               | 0.0001  |
| SESgee(AR(1)) Vs glmmLasso            | 0.0001  |
| <b>Temporal-static scenario</b>       |         |
| Methods                               | p-value |
| SES Vs LASSO                          | 0.0001  |
| <b>Static-longitudinal scenario</b>   |         |
| Methods                               | p-value |
| SES Vs GLASSO                         | 0.4024  |
| <b>Static-distinct scenario</b>       |         |
| Methods                               | p-value |
| SES Vs LASSO                          | 0.068   |

Table S12: KEGG Pathways significantly enriched at FDR level of 0.1 for the SES signature selected on Dataset GDS947.

| ID       | Description              | p-value | adjusted p-value |
|----------|--------------------------|---------|------------------|
| mmu04978 | Mineral absorption       | 0.017   | 0.056            |
| mmu01524 | Platinum drug resistance | 0.028   | 0.056            |
| mmu03010 | Ribosome                 | 0.064   | 0.086            |
| mmu04010 | MAPK signaling pathway   | 0.091   | 0.091            |

Table S13: KEGG Pathways significantly enriched at FDR level of 0.1 for the SES signature selected on Dataset GDS972.

| ID       | Description                                 | p-value | adjusted p-value |
|----------|---------------------------------------------|---------|------------------|
| rno05134 | Legionellosis                               | 0.021   | 0.07             |
| rno04540 | Gap junction                                | 0.031   | 0.07             |
| rno05162 | Measles                                     | 0.048   | 0.07             |
| rno04141 | Protein processing in endoplasmic reticulum | 0.058   | 0.07             |
| rno05164 | Influenza A                                 | 0.06    | 0.07             |
| rno04145 | Phagosome                                   | 0.07    | 0.07             |

Table S14: KEGG Pathways significantly enriched at FDR level of 0.1 for the SES signature selected on Dataset GDS2135.

| ID       | Description                                            | p-value | adjusted p-value |
|----------|--------------------------------------------------------|---------|------------------|
| mmu04512 | ECM-receptor interaction                               | 0.000   | 0.004            |
| mmu05222 | Small cell lung cancer                                 | 0.000   | 0.004            |
| mmu04510 | Focal adhesion                                         | 0.002   | 0.015            |
| mmu04151 | PI3K-Akt signaling pathway                             | 0.005   | 0.033            |
| mmu05200 | Pathways in cancer                                     | 0.007   | 0.034            |
| mmu05140 | Leishmaniasis                                          | 0.025   | 0.062            |
| mmu05412 | Arrhythmogenic right ventricular cardiomyopathy (ARVC) | 0.026   | 0.062            |
| mmu05133 | Pertussis                                              | 0.028   | 0.062            |
| mmu05100 | Bacterial invasion of epithelial cells                 | 0.028   | 0.062            |
| mmu05410 | Hypertrophic cardiomyopathy (HCM)                      | 0.031   | 0.062            |
| mmu05414 | Dilated cardiomyopathy                                 | 0.033   | 0.062            |
| mmu04974 | Protein digestion and absorption                       | 0.033   | 0.062            |
| mmu03015 | mRNA surveillance pathway                              | 0.035   | 0.062            |
| mmu04933 | AGE-RAGE signaling pathway in diabetic complications   | 0.037   | 0.062            |
| mmu05146 | Amoebiasis                                             | 0.039   | 0.062            |
| mmu05145 | Toxoplasmosis                                          | 0.04    | 0.062            |
| mmu04670 | Leukocyte transendothelial migration                   | 0.042   | 0.062            |
| mmu04611 | Platelet activation                                    | 0.045   | 0.063            |
| mmu04530 | Tight junction                                         | 0.061   | 0.075            |
| mmu04514 | Cell adhesion molecules (CAMs)                         | 0.061   | 0.075            |
| mmu04360 | Axon guidance                                          | 0.064   | 0.075            |
| mmu04145 | Phagosome                                              | 0.066   | 0.075            |
| mmu05205 | Proteoglycans in cancer                                | 0.075   | 0.077            |
| mmu04015 | Rap1 signaling pathway                                 | 0.077   | 0.077            |
| mmu04810 | Regulation of actin cytoskeleton                       | 0.077   | 0.077            |

Table S15: KEGG Pathways significantly enriched at FDR level of 0.1 for the SES signature selected on Dataset GDS2456.

| ID       | Description                                 | p-value | adjusted p-value |
|----------|---------------------------------------------|---------|------------------|
| mmu00260 | Glycine, serine and threonine metabolism    | 0.015   | 0.042            |
| mmu03050 | Proteasome                                  | 0.017   | 0.042            |
| mmu01230 | Biosynthesis of amino acids                 | 0.029   | 0.048            |
| mmu01200 | Carbon metabolism                           | 0.043   | 0.054            |
| mmu04141 | Protein processing in endoplasmic reticulum | 0.061   | 0.061            |

Table S16: KEGG Pathways significantly enriched at FDR level of 0.1 for the SES signature selected on Dataset GDS2688.

| ID       | Description                              | p-value | adjusted p-value |
|----------|------------------------------------------|---------|------------------|
| rno04962 | Vasopressin-regulated water reabsorption | 0.021   | 0.066            |
| rno04721 | Synaptic vesicle cycle                   | 0.030   | 0.066            |
| rno05100 | Bacterial invasion of epithelial cells   | 0.038   | 0.066            |
| rno04512 | ECM-receptor interaction                 | 0.040   | 0.066            |
| rno04727 | GABAergic synapse                        | 0.043   | 0.066            |
| rno04974 | Protein digestion and absorption         | 0.044   | 0.066            |

Table S17: KEGG Pathways significantly enriched at FDR level of 0.1 for the SES signature selected on Dataset GDS2882.

| ID       | Description                                       | p-value | adjusted p-value |
|----------|---------------------------------------------------|---------|------------------|
| mmu05222 | Small cell lung cancer                            | 0.001   | 0.007            |
| mmu04657 | IL-17 signaling pathway                           | 0.001   | 0.007            |
| mmu04064 | NF-kappa B signaling pathway                      | 0.001   | 0.007            |
| mmu04668 | TNF signaling pathway                             | 0.001   | 0.007            |
| mmu05167 | Kaposi's sarcoma-associated herpesvirus infection | 0.004   | 0.018            |
| mmu05203 | Viral carcinogenesis                              | 0.005   | 0.020            |
| mmu05200 | Pathways in cancer                                | 0.013   | 0.047            |
| mmu04923 | Regulation of lipolysis in adipocytes             | 0.027   | 0.069            |
| mmu04370 | VEGF signaling pathway                            | 0.028   | 0.069            |
| mmu04913 | Ovarian steroidogenesis                           | 0.028   | 0.069            |
| mmu05140 | Leishmaniasis                                     | 0.033   | 0.069            |
| mmu04622 | RIG-I-like receptor signaling pathway             | 0.033   | 0.069            |
| mmu00590 | Arachidonic acid metabolism                       | 0.043   | 0.080            |
| mmu05204 | Chemical carcinogenesis                           | 0.045   | 0.080            |
| mmu04620 | Toll-like receptor signaling pathway              | 0.048   | 0.080            |
| mmu04919 | Thyroid hormone signaling pathway                 | 0.056   | 0.087            |
| mmu04726 | Serotonergic synapse                              | 0.064   | 0.088            |
| mmu05160 | Hepatitis C                                       | 0.065   | 0.088            |
| mmu05161 | Hepatitis B                                       | 0.069   | 0.088            |
| mmu04723 | Retrograde endocannabinoid signaling              | 0.072   | 0.088            |
| mmu04921 | Oxytocin signaling pathway                        | 0.074   | 0.088            |
| mmu04621 | NOD-like receptor signaling pathway               | 0.081   | 0.092            |



Table S18: KEGG Pathways significantly enriched at FDR level of 0.1 for the SES signature selected on Dataset GDS3145.

| ID       | Description                               | p-value | adjusted p-value |
|----------|-------------------------------------------|---------|------------------|
| mmu03030 | DNA replication                           | 0.013   | 0.076            |
| mmu00561 | Glycerolipid metabolism                   | 0.022   | 0.076            |
| mmu01521 | EGFR tyrosine kinase inhibitor resistance | 0.029   | 0.076            |
| mmu03320 | PPAR signaling pathway                    | 0.031   | 0.076            |
| mmu04066 | HIF-1 signaling pathway                   | 0.038   | 0.076            |
| mmu04110 | Cell cycle                                | 0.045   | 0.076            |
| mmu04371 | Apelin signaling pathway                  | 0.051   | 0.076            |
| mmu04910 | Insulin signaling pathway                 | 0.051   | 0.076            |
| mmu04150 | mTOR signaling pathway                    | 0.056   | 0.076            |
| mmu05010 | Alzheimer's disease                       | 0.064   | 0.076            |
| mmu03010 | Ribosome                                  | 0.064   | 0.076            |
| mmu05205 | Proteoglycans in cancer                   | 0.075   | 0.081            |

Table S19: KEGG Pathways significantly enriched at FDR level of 0.1 for the SES signature selected on Dataset GDS3326.

| ID       | Description                            | p-value | adjusted p-value |
|----------|----------------------------------------|---------|------------------|
| hsa00512 | Mucin type O-glycan biosynthesis       | 0.009   | 0.034            |
| hsa05323 | Rheumatoid arthritis                   | 0.025   | 0.035            |
| hsa04064 | NF-kappa B signaling pathway           | 0.026   | 0.035            |
| hsa04060 | Cytokine-cytokine receptor interaction | 0.073   | 0.073            |

Table S20: KEGG Pathways significantly enriched at FDR level of 0.1 for the SES signature selected on Dataset GDS3915.

| ID       | Description                                               | p-value | adjusted p-value |
|----------|-----------------------------------------------------------|---------|------------------|
| rno04964 | Proximal tubule bicarbonate reclamation                   | 0.013   | 0.077            |
| rno00592 | alpha-Linolenic acid metabolism                           | 0.015   | 0.077            |
| rno04960 | Aldosterone-regulated sodium reabsorption                 | 0.023   | 0.077            |
| rno00591 | Linoleic acid metabolism                                  | 0.025   | 0.077            |
| rno04973 | Carbohydrate digestion and absorption                     | 0.025   | 0.077            |
| rno00565 | Ether lipid metabolism                                    | 0.027   | 0.077            |
| rno04978 | Mineral absorption                                        | 0.027   | 0.077            |
| rno04961 | Endocrine and other factor-regulated calcium reabsorption | 0.030   | 0.077            |
| rno04923 | Regulation of lipolysis in adipocytes                     | 0.034   | 0.077            |
| rno04918 | Thyroid hormone synthesis                                 | 0.043   | 0.077            |
| rno04976 | Bile secretion                                            | 0.043   | 0.077            |
| rno04971 | Gastric acid secretion                                    | 0.044   | 0.077            |
| rno04970 | Salivary secretion                                        | 0.046   | 0.077            |
| rno05100 | Bacterial invasion of epithelial cells                    | 0.047   | 0.077            |
| rno04260 | Cardiac muscle contraction                                | 0.048   | 0.077            |
| rno00590 | Arachidonic acid metabolism                               | 0.049   | 0.077            |
| rno04911 | Insulin secretion                                         | 0.051   | 0.077            |
| rno04666 | Fc gamma R-mediated phagocytosis                          | 0.052   | 0.077            |
| rno04974 | Protein digestion and absorption                          | 0.055   | 0.077            |
| rno00564 | Glycerophospholipid metabolism                            | 0.058   | 0.077            |
| rno04972 | Pancreatic secretion                                      | 0.058   | 0.077            |
| rno04713 | Circadian entrainment                                     | 0.058   | 0.077            |
| rno04919 | Thyroid hormone signaling pathway                         | 0.069   | 0.087            |

Table S21: KEGG Pathways significantly enriched at FDR level of 0.1 for the SES signature selected on Dataset GDS4258.

| ID       | Description                             | p-value | adjusted p-value |
|----------|-----------------------------------------|---------|------------------|
| hsa04710 | Circadian rhythm                        | 0.013   | 0.076            |
| hsa04012 | ErbB signaling pathway                  | 0.035   | 0.089            |
| hsa04390 | Hippo signaling pathway                 | 0.062   | 0.089            |
| hsa05202 | Transcriptional misregulation in cancer | 0.072   | 0.089            |
| hsa04062 | Chemokine signaling pathway             | 0.074   | 0.089            |

Table S22: KEGG Pathways significantly enriched at FDR level of 0.1 for the SES signature selected on Dataset GDS4395.

| ID       | Description                        | p-value | adjusted p-value |
|----------|------------------------------------|---------|------------------|
| hsa04137 | Mitophagy - animal                 | 0.027   | 0.099            |
| hsa04924 | Renin secretion                    | 0.027   | 0.099            |
| hsa04270 | Vascular smooth muscle contraction | 0.049   | 0.099            |
| hsa05012 | Parkinson's disease                | 0.057   | 0.099            |
| hsa04022 | cGMP-PKG signaling pathway         | 0.066   | 0.099            |
| hsa05010 | Alzheimer's disease                | 0.069   | 0.099            |
| hsa04020 | Calcium signaling pathway          | 0.073   | 0.099            |
| hsa04024 | cAMP signaling pathway             | 0.08    | 0.099            |

Table S23: KEGG Pathways significantly enriched at FDR level of 0.1 for the SES signature selected on Dataset GDS4822.

| ID       | Description                         | p-value | adjusted p-value |
|----------|-------------------------------------|---------|------------------|
| mmu03018 | RNA degradation                     | 0.02    | 0.042            |
| mmu04925 | Aldosterone synthesis and secretion | 0.021   | 0.042            |
| mmu04010 | MAPK signaling pathway              | 0.061   | 0.082            |
| mmu04151 | PI3K-Akt signaling pathway          | 0.084   | 0.084            |
